# Supplementary material
Source: PubMed Central journal article supplement (PMC1691232)
Supplement: 12590761s01.pdf [file 12590761s01.pdf]

These are electronic appendices to the paper by Lotem *et al.* 2003 From reciprocity to unconditional altruism through signalling benefits. *Proc. R. Soc. Lond. B* **270**, 199—205. (DOI 10.1098/rspb.2002.2225.)

Electronic appendices are refereed with the text. However, no attempt is made to impose a uniform editorial style on the electronic appendices.

## Electronic Appendix A

We have defined the frequencies of  $\mathbf{UA}_H$ ,  $\mathbf{TfT}_H$ , and  $\mathbf{DE}_H$  by  $x_1, x_2, x_3$  and the frequencies of  $\mathbf{UA}_L$ ,  $\mathbf{TfT}_L$ , and  $\mathbf{DE}_L$  by  $y_1, y_2, y_3$ . That is, the respective *strategy sets* of the high and the low quality players are given by

$$\mathbf{X} = \{x_1\mathbf{e}_1 + x_2\mathbf{e}_2 + x_3\mathbf{e}_3 \mid x_1, x_2, x_3 \geq 0 \text{ and } x_1 + x_2 + x_3 = 1\}$$

(A.1a)

$$\mathbf{Y} = \{y_1\mathbf{e}_1 + y_2\mathbf{e}_2 + y_3\mathbf{e}_3 \mid y_1, y_2, y_3 \geq 0 \text{ and } y_1 + y_2 + y_3 = 1\}$$

where  $\{\mathbf{e}_1, \mathbf{e}_2, \mathbf{e}_3\}$  is the *standard basis* of  $\mathbf{R}^3 = (-\infty, \infty)^3$ , i.e.,

$$\mathbf{e}_1 = \begin{pmatrix} 1 \\ 0 \\ 0 \end{pmatrix}, \mathbf{e}_2 = \begin{pmatrix} 0 \\ 1 \\ 0 \end{pmatrix}, \mathbf{e}_3 = \begin{pmatrix} 0 \\ 0 \\ 1 \end{pmatrix}.$$

(A.1b)

Let us define a population strategy profile by  $(\mathbf{x}, \mathbf{y}) \in \mathbf{X} \times \mathbf{Y}$ , then the payoff to a high quality player using strategy  $\mathbf{a} \in \mathbf{X}$  is given by

$$v_1(\mathbf{a}, (\mathbf{x}, \mathbf{y})) = \mathbf{a}^t \circ \mathbf{P}_{HH}(\mathbf{x}, \mathbf{y}) \circ \mathbf{x} + \mathbf{a}^t \circ \mathbf{P}_{HL}(\mathbf{x}, \mathbf{y}) \circ \mathbf{y}.$$

(A.2a)

Whereas the payoff to a low quality player using strategy  $\mathbf{b} \in \mathbf{Y}$  is given by

$$v_2(\mathbf{b}, (\mathbf{x}, \mathbf{y})) = \mathbf{b}^t \circ \mathbf{P}_{LH}(\mathbf{x}, \mathbf{y}) \circ \mathbf{x} + \mathbf{b}^t \circ \mathbf{P}_{LL}(\mathbf{x}, \mathbf{y}) \circ \mathbf{y}.$$

(A.2b)

The idea of evolutionary stability is based on the concept of an *invasion barrier*. In the current case, a strategy profile  $(\mathbf{x}^*, \mathbf{y}^*) \in \mathbf{X} \times \mathbf{Y}$  is an ESS: if a population in which all high quality individuals play  $\mathbf{x}^*$  and all low quality individuals play  $\mathbf{y}^*$  cannot be invaded by mutants or emigrants, of either or both quality types, using any alternative strategies — provided the numbers of these invaders are sufficiently small relative to the invaded population.

To qualify the term “sufficiently small” we use the dynamical approach advanced by Cressman (1992, chapter - 3). Let a strategy profile  $(\mathbf{x}^*, \mathbf{y}^*) \in \mathbf{X} \times \mathbf{Y}$  be given. We construct the dynamical form of the game prescribed by the system (6-9) relative to  $(\mathbf{x}^*, \mathbf{y}^*)$  as follows.

Let  $(\mathbf{x}, \mathbf{y})$  be a arbitrary alternate strategy profile. Let  $N_{11}$  and  $N_{12}$  be the densities of the  $\mathbf{x}^*$ , and  $\mathbf{x}$  players respectively. Similarly, let  $N_{21}$  and  $N_{22}$  be the densities of the  $\mathbf{y}^*$ , and  $\mathbf{y}$  players ( $N_{11} + N_{12} = N_1$ ;  $N_{21} + N_{22} = N_2$ ). Let  $b_i$  be the background fitness of

the individuals in the population (independent of the game in question), and let  $d_i$  be their death rate. Finally, let us define  $p = N_{12} / N_1$ ,  $s = N_{22} / N_2$ . We can express the post-invasion population (average) strategies in terms of  $p$  and  $s$  as

$$(A.3a) \quad \begin{aligned} \mathbf{x}_p &= (1-p)\mathbf{x}^* + p\mathbf{x} = \mathbf{x}^* + p(\mathbf{x} - \mathbf{x}^*) \\ &\text{and} \\ \mathbf{y}_s &= (1-s)\mathbf{y}^* + s\mathbf{y} = \mathbf{y}^* + s(\mathbf{y} - \mathbf{y}^*) \end{aligned}$$

In these terms the dynamics of  $N_{11}$ ,  $N_{12}$ ,  $N_{21}$ , and  $N_{22}$  are given by

$$(A.3b) \quad \begin{aligned} \frac{dN_{11}}{dt} &= N_{11} [b_1 + v_1(\mathbf{x}^*, (\mathbf{x}_p, \mathbf{y}_s)) - d_1] \\ \frac{dN_{12}}{dt} &= N_{12} [b_1 + v_1(\mathbf{x}, (\mathbf{x}_p, \mathbf{y}_s)) - d_1] \\ \frac{dN_{21}}{dt} &= N_{21} [b_2 + v_2(\mathbf{y}^*, (\mathbf{x}_p, \mathbf{y}_s)) - d_2] \\ \frac{dN_{22}}{dt} &= N_{22} [b_2 + v_2(\mathbf{y}, (\mathbf{x}_p, \mathbf{y}_s)) - d_2] \end{aligned}$$

And, consequently, the dynamics of  $p$  and  $s$  are given by

$$(A.3c) \quad \begin{aligned} p' &= \frac{d}{dt} \left( \frac{N_{12}}{N_1} \right) = -p(1-p)v_1(\mathbf{x}^* - \mathbf{x}, (\mathbf{x}_p, \mathbf{y}_s)) & p(0) &= p_0 \\ &\text{and} & & \text{and} \\ s' &= \frac{d}{dt} \left( \frac{N_{22}}{N_2} \right) = -s(1-s)v_2(\mathbf{y}^* - \mathbf{y}, (\mathbf{x}_p, \mathbf{y}_s)) & s(0) &= s_0 \end{aligned}$$

We see that an invasion fails *if, and only if, (iff)*  $(p(t), s(t))$  converges to  $(0, 0)$ . Thus, we say that a strategy profile  $(\mathbf{x}^*, \mathbf{y}^*)$  is *locally asymptotically stable* (las) with respect to the strategy profile  $(\mathbf{x}, \mathbf{y})$  *iff* exist  $\delta_{xy}$ ,  $\varepsilon_{xy} > 0$  such that whenever  $0 < p_0 < \delta_{xy}$  and  $0 < s_0 < \varepsilon_{xy}$ ,  $(p(t), s(t))$  converges to  $(0, 0)$ . Clearly,  $(\mathbf{x}^*, \mathbf{y}^*) \in \mathbf{X} \times \mathbf{Y}$  is an ESS *iff*  $(\mathbf{x}^*, \mathbf{y}^*)$  is las with respect to any strategy profile  $(\mathbf{x}, \mathbf{y}) \neq (\mathbf{x}^*, \mathbf{y}^*)$ .

To qualify this statement we follow Cressman in expanding  $v_1(\mathbf{x}^* - \mathbf{x}, (\mathbf{x}_p, \mathbf{y}_s))$  and  $v_2(\mathbf{y}^* - \mathbf{y}, (\mathbf{x}_p, \mathbf{y}_s))$  as power series in  $p$  and  $s$  to obtain

$$\begin{aligned}
v_1(\mathbf{x}^* - \mathbf{x}, (\mathbf{x}_p, \mathbf{y}_s)) &= (\mathbf{x}^* - \mathbf{x})^t \circ [\mathbf{P}_{HH}(\mathbf{x}_p, \mathbf{y}_s) \circ \mathbf{x}_p + \mathbf{P}_{HL}(\mathbf{x}_p, \mathbf{y}_s) \circ \mathbf{y}_s] \\
&= (\mathbf{x}^* - \mathbf{x})^t \circ [\mathbf{P}_{HH}(\mathbf{x}^*, \mathbf{y}^*) \circ \mathbf{x}^* + \mathbf{P}_{HL}(\mathbf{x}^*, \mathbf{y}^*) \circ \mathbf{y}^*] + \\
\text{(A.4a)} \quad & p[(\mathbf{x}^* - \mathbf{x})^t \circ \mathbf{P}_{HH}(\mathbf{x}^*, \mathbf{y}^*) \circ (\mathbf{x} - \mathbf{x}^*) + r(1-q)S(x_2 - x_2^*)(x_3 - x_3^*)] \\
& + s[(\mathbf{x}^* - \mathbf{x})^t \circ \mathbf{P}_{HL}(\mathbf{x}^*, \mathbf{y}^*) \circ (\mathbf{y} - \mathbf{y}^*) + rqS(x_2 - x_2^*)(y_3 - y_3^*)] = \\
& \alpha_{00}((\mathbf{x}^*, \mathbf{y}^*), (\mathbf{x}, \mathbf{y})) + p\alpha_{10}((\mathbf{x}^*, \mathbf{y}^*), (\mathbf{x}, \mathbf{y})) + s\alpha_{01}((\mathbf{x}^*, \mathbf{y}^*), (\mathbf{x}, \mathbf{y}))
\end{aligned}$$

and

$$\begin{aligned}
v_2(\mathbf{y}^* - \mathbf{y}, (\mathbf{x}_p, \mathbf{y}_s)) &= (\mathbf{y}^* - \mathbf{y})^t \circ [\mathbf{P}_{LH}(\mathbf{x}^*, \mathbf{y}^*) \circ \mathbf{x}^* + \mathbf{P}_{LL}(\mathbf{x}^*, \mathbf{y}^*) \circ \mathbf{y}^*] + \\
& p[(\mathbf{y}^* - \mathbf{y})^t \circ \mathbf{P}_{LH}(\mathbf{x}^*, \mathbf{y}^*) \circ (\mathbf{x} - \mathbf{x}^*) + r(1-q)S(y_2 - y_2^*)(x_3 - x_3^*)] + \\
\text{(A.4b)} \quad & s[(\mathbf{y}^* - \mathbf{y})^t \circ \mathbf{P}_{LL}(\mathbf{x}^*, \mathbf{y}^*) \circ (\mathbf{y} - \mathbf{y}^*) + rqS(y_2 - y_2^*)(y_3 - y_3^*)] = \\
& \beta_{00}((\mathbf{x}^*, \mathbf{y}^*), (\mathbf{x}, \mathbf{y})) + p\beta_{10}((\mathbf{x}^*, \mathbf{y}^*), (\mathbf{x}, \mathbf{y})) + s\beta_{01}((\mathbf{x}^*, \mathbf{y}^*), (\mathbf{x}, \mathbf{y}))
\end{aligned}$$

That is, the expansions of  $v_1(\mathbf{x}^* - \mathbf{x}, (\mathbf{x}_p, \mathbf{y}_s))$  and  $v_2(\mathbf{y}^* - \mathbf{y}, (\mathbf{x}_p, \mathbf{y}_s))$  as power series in  $p$  and  $s$  is analogous to the corresponding expansions for two-type games with constant payoff matrices. Thus (Cressman, 1992, ch - 3),  $(\mathbf{x}^*, \mathbf{y}^*) \in \mathbf{X} \times \mathbf{Y}$  is an ESS of system (6-9) if for every strategy profile  $(\mathbf{x}, \mathbf{y}) \neq (\mathbf{x}^*, \mathbf{y}^*)$

$$\begin{aligned}
\text{(a)} \quad & \alpha_{00}((\mathbf{x}^*, \mathbf{y}^*), (\mathbf{x}, \mathbf{y})) \geq 0 \text{ and } \alpha_{00}((\mathbf{x}^*, \mathbf{y}^*), (\mathbf{x}, \mathbf{y})) = 0 \Rightarrow \alpha_{10}((\mathbf{x}^*, \mathbf{y}^*), (\mathbf{x}, \mathbf{y})) > 0 \\
\text{(b)} \quad & \beta_{00}((\mathbf{x}^*, \mathbf{y}^*), (\mathbf{x}, \mathbf{y})) \geq 0 \text{ and } \beta_{00}((\mathbf{x}^*, \mathbf{y}^*), (\mathbf{x}, \mathbf{y})) = 0 \Rightarrow \beta_{01}((\mathbf{x}^*, \mathbf{y}^*), (\mathbf{x}, \mathbf{y})) > 0 \\
\text{(A.5)} \quad & \text{If } \alpha_{00}((\mathbf{x}^*, \mathbf{y}^*), (\mathbf{x}, \mathbf{y})) = \beta_{00}((\mathbf{x}^*, \mathbf{y}^*), (\mathbf{x}, \mathbf{y})) = 0 \text{ then} \\
& \text{either} \\
\text{(c)} \quad & \alpha_{01}((\mathbf{x}^*, \mathbf{y}^*), (\mathbf{x}, \mathbf{y})) \geq 0 \text{ or } \beta_{10}((\mathbf{x}^*, \mathbf{y}^*), (\mathbf{x}, \mathbf{y})) \geq 0 \\
& \text{or} \\
\text{(d)} \quad & \alpha_{10}((\mathbf{x}^*, \mathbf{y}^*), (\mathbf{x}, \mathbf{y}))\beta_{01}((\mathbf{x}^*, \mathbf{y}^*), (\mathbf{x}, \mathbf{y})) > \alpha_{01}((\mathbf{x}^*, \mathbf{y}^*), (\mathbf{x}, \mathbf{y}))\beta_{10}((\mathbf{x}^*, \mathbf{y}^*), (\mathbf{x}, \mathbf{y}))
\end{aligned}$$

**Remark.** ESS points are not the only evolutionary stable solutions of evolutionary games (Cressman, 1992; ch - 6). There is also the possibility of a set of solutions exhibiting neutral stability among themselves, while being ESS-like in comparison with the strategies not in that set—*evolutionarily stable sets* (ES sets).

## Electronic Appendix B

We find the evolutionary stable solutions of system (6-9) by a two step process. In step – I we use the fact (cf. Weibull, 1996) that a strategy profile  $(\mathbf{x}^*, \mathbf{y}^*)$  is an evolutionary stable solution of system (6-9) *only if*

$$(B.0a) \quad v_1(\mathbf{x}^* - \mathbf{e}_j, (\mathbf{x}^*, \mathbf{y}^*))x_j = v_2(\mathbf{y}^* - \mathbf{e}_j, (\mathbf{x}^*, \mathbf{y}^*))y_j = 0 \text{ for } j = 1, 2.$$

In step – 2 we apply the ESS criterion (A.5) to these potential ESS solutions. In this specific case, system (6-9) has thirteen potential ESS solutions and one potential ES set solution.

$$(B.1a) \quad \begin{aligned} &(\mathbf{x}_1, \mathbf{y}_1) = (\mathbf{e}_1, \mathbf{e}_3) \\ &\text{now} \\ &\alpha_{00}((\mathbf{x}_1, \mathbf{y}_1), (\mathbf{x}, \mathbf{y})) = (S - C)(qrx_2 + x_3) \\ &\text{and} \\ &\beta_{00}((\mathbf{x}_1, \mathbf{y}_1), (\mathbf{x}, \mathbf{y})) = (D - S)[y_1 + (1 - qr)y_2] \end{aligned}$$

Hence  $(\mathbf{x}_1, \mathbf{y}_1) \leftrightarrow (\mathbf{U}\mathbf{A}_H, \mathbf{D}\mathbf{E}_L)$  is an ESS whenever

$$(B.1b) \quad C < S < D.$$

$$(B.2a) \quad \begin{aligned} &(\mathbf{x}_2, \mathbf{y}_2) = (\mathbf{e}_2, \mathbf{e}_3) \\ &\text{now} \\ &\alpha_{00}((\mathbf{x}_2, \mathbf{y}_2), (\mathbf{x}, \mathbf{y})) = qr(C - S)x_1 + r(B - C + S)(\theta_2 - q)x_3 \\ &\text{and} \\ &\beta_{00}((\mathbf{x}_2, \mathbf{y}_2), (\mathbf{x}, \mathbf{y})) = rB(q - 1 + \theta_0)y_1 + rB(1 - \rho)(q - \theta_1)y_2 \\ &\text{where} \\ &\rho = \frac{D - S}{B}; \theta_1 = \frac{r - \rho}{r(1 - \rho)}; \theta_2 = \frac{rB - C + S}{r(B - C + S)}; \theta_3 = \frac{\rho}{r} \end{aligned}$$

Since  $r > C/B$  (Fishman *et al.*, 2001),  $(\mathbf{x}_2, \mathbf{y}_2) \leftrightarrow (\mathbf{T}\mathbf{f}\mathbf{T}_H, \mathbf{D}\mathbf{E}_L)$  is an ESS whenever.

$$(B.2b) \quad \begin{aligned} &C < D - B, S < C, \text{ and } q < \theta_2 \\ &C > D - B, D - B < S < C, \rho < r, \text{ and } \theta_1 < q < \theta_2 \end{aligned}$$

$$(B.3) \quad \begin{aligned} &(\mathbf{x}_3, \mathbf{y}_3) = (\mathbf{e}_3, \mathbf{e}_1) \neq (\mathbf{e}_1, \mathbf{e}_3) \\ &\text{but} \\ &\alpha_{00}((\mathbf{x}_3, \mathbf{y}_3), (\mathbf{e}_1, \mathbf{e}_3)) = C - S \\ &\text{and} \\ &\beta_{00}((\mathbf{x}_3, \mathbf{y}_3), (\mathbf{e}_1, \mathbf{e}_3)) = S - D \end{aligned}$$

Thus, since  $D > C$ ,  $(\mathbf{x}_3, \mathbf{y}_3)$  is not an ESS.

$$\begin{aligned}
& (\mathbf{x}_4, \mathbf{y}_4) = (\mathbf{e}_3, \mathbf{e}_2) \neq (\mathbf{e}_2, \mathbf{e}_3) \\
& \text{but} \\
\text{(B.4)} \quad & \alpha_{00}((\mathbf{x}_4, \mathbf{y}_4), (\mathbf{e}_2, \mathbf{e}_3)) = (1-r+qr)(C-S) - qrB \\
& \text{and} \\
& \beta_{00}((\mathbf{x}_4, \mathbf{y}_4), (\mathbf{e}_2, \mathbf{e}_3)) = qrB - (1-r+qr)(D-S)
\end{aligned}$$

Thus, since  $D > C$ ,  $(\mathbf{x}_4, \mathbf{y}_4)$  is not an ESS.

$$\begin{aligned}
& (\mathbf{x}_5, \mathbf{y}_5) = (\mathbf{e}_3, \mathbf{e}_3) \\
& \text{now} \\
\text{(B.5a)} \quad & \alpha_{00}((\mathbf{x}_5, \mathbf{y}_5), (\mathbf{x}, \mathbf{y})) = (C-S)[x_1 + (1-r)x_2] \\
& \text{and} \\
& \beta_{00}((\mathbf{x}_5, \mathbf{y}_5), (\mathbf{x}, \mathbf{y})) = (D-S)[y_1 + (1-r)y_2]
\end{aligned}$$

Hence  $(\mathbf{x}_5, \mathbf{y}_5) \leftrightarrow (\mathbf{DE}_H, \mathbf{DE}_L)$  is an ESS whenever

$$\text{(B.5b)} \quad S < C.$$

$$\begin{aligned}
& (\mathbf{x}_6, \mathbf{y}_6) = (\mathbf{e}_1, \gamma \mathbf{e}_2 + (1-\gamma)\mathbf{e}_3) \quad : \gamma = \frac{(1-qr)(D-S)}{qr(B-D+S)} \\
& \text{now} \\
& \alpha_{00}((\mathbf{x}_6, \mathbf{y}_6), (\mathbf{x}, \mathbf{y})) = qr(S-C)(1-\gamma)x_2 + [S-C+qrB\gamma]x_3 = 0 \Leftrightarrow \mathbf{x} = \mathbf{e}_1 \\
& \text{and} \\
\text{(B.6a)} \quad & \beta_{00}((\mathbf{x}_6, \mathbf{y}_6), (\mathbf{x}, \mathbf{y})) = qr(D-S)(1-\gamma)y_1 \\
& \text{thus} \\
& \beta_{00}((\mathbf{x}_6, \mathbf{y}_6), (\mathbf{x}, \mathbf{y})) = 0 \Leftrightarrow \mathbf{y} = \mathbf{y}_\lambda \equiv \lambda \mathbf{e}_2 + (1-\lambda)\mathbf{e}_3 \quad \text{for } 0 \leq \lambda \leq 1 \\
& \text{but} \\
& \beta_{01}((\mathbf{x}_6, \mathbf{y}_6), (\mathbf{e}_1, \mathbf{y}_\lambda)) = qr(D-B+S)(\lambda-\gamma)^2
\end{aligned}$$

Hence  $(\mathbf{x}_6, \mathbf{y}_6) \leftrightarrow (\mathbf{UA}_H, \mathbf{TfT}_L \oplus \mathbf{DE}_L)$  is an ESS whenever

$$\begin{aligned}
& C < D - B < S < D, \rho < r, \text{ and } \theta_3 < q \\
\text{(B.6b)} \quad & \text{or} \\
& D - B < C < S < D, \rho < r, \text{ and } \theta_3 < q
\end{aligned}$$

$$\begin{aligned}
(\mathbf{x}_7, \mathbf{y}_7) &= (\mathbf{e}_2, \mu \mathbf{e}_2 + (1 - \mu) \mathbf{e}_3) \quad : \mu = (q - \theta_1) / q \\
&\text{now} \\
\alpha_{00}((\mathbf{x}_7, \mathbf{y}_7), (\mathbf{x}, \mathbf{y})) &= r(C - S)\theta_1 x_1 + (1 - r\theta_1)(D - C)x_3 \\
&\text{thus} \\
\alpha_{00}((\mathbf{x}_7, \mathbf{y}_7), (\mathbf{x}, \mathbf{y})) &= 0 \Leftrightarrow \mathbf{x} = \mathbf{e}_2 \\
&\text{and} \\
\beta_{00}((\mathbf{x}_7, \mathbf{y}_7), (\mathbf{x}, \mathbf{y})) &= r(D - S)\theta_1 y_1 \\
&\text{thus} \\
\beta_{00}((\mathbf{x}_7, \mathbf{y}_7), (\mathbf{x}, \mathbf{y})) &= 0 \Leftrightarrow \mathbf{y} = \mathbf{y}_\lambda \equiv \lambda \mathbf{e}_2 + (1 - \lambda) \mathbf{e}_3 \quad \text{for } 0 \leq \lambda \leq 1 \\
&\text{but} \\
\beta_{01}((\mathbf{x}_7, \mathbf{y}_7), (\mathbf{e}_2, \mathbf{y}_\lambda)) &= qrB(1 - \rho)(\lambda - \mu)^2
\end{aligned}$$

(B.7a)

Hence  $(\mathbf{x}_7, \mathbf{y}_7) \leftrightarrow (\mathbf{TfT}_H, \mathbf{TfT}_L \oplus \mathbf{DE}_L)$  is an ESS whenever

$$(B.7b) \quad D - B < C, D - B < S < C, r > \rho \text{ and } q > \theta_1.$$

$$\begin{aligned}
(\mathbf{x}_8, \mathbf{y}_8) &= (\mathbf{e}_3, \chi \mathbf{e}_2 + (1 - \chi) \mathbf{e}_3) \quad : \chi = \frac{(1 - r)(D - S)}{qr(S + B - D)} \\
&\text{that is} \\
0 < \chi &\Leftrightarrow D - B < S < D \\
&\text{now} \\
(\mathbf{x}_8, \mathbf{y}_8) &\neq (\mathbf{e}_2, \mathbf{y}_8) \\
&\text{but} \\
\alpha_{00}((\mathbf{x}_8, \mathbf{y}_8), (\mathbf{e}_2, \mathbf{y}_8)) &= -qrB \frac{D - C}{D - S} \chi \\
&\text{and} \\
\beta_{ij}((\mathbf{x}_8, \mathbf{y}_8), (\mathbf{e}_2, \mathbf{y}_8)) &= 0 \quad \text{for } i, j = 0, 1
\end{aligned}$$

(B.8)

Thus,  $(\mathbf{x}_8, \mathbf{y}_8)$  is not an ESS.

$$\begin{aligned}
(\mathbf{x}_9, \mathbf{y}_9) &= (\delta_1 \mathbf{e}_2 + (1 - \delta_1) \mathbf{e}_3, \mathbf{e}_1) \quad : \delta_1 = \frac{(1 - r + qr)(C - S)}{(1 - q)r(B - C + S)} \\
&\text{that is} \\
0 < \delta_1 &\Leftrightarrow S < C < D \\
&\text{now} \\
(\mathbf{x}_9, \mathbf{y}_9) &\neq (\mathbf{x}_9, \mathbf{e}_2) \\
&\text{but} \\
\alpha_{ij}((\mathbf{x}_9, \mathbf{y}_9), (\mathbf{x}_9, \mathbf{e}_2)) &= 0 \quad \text{for } i, j = 0, 1 \\
&\text{and} \\
\beta_{00}((\mathbf{x}_9, \mathbf{y}_9), (\mathbf{x}_9, \mathbf{e}_2)) &= -r(1 - q)(D - S)(1 - \delta_1)
\end{aligned}$$

(B.9)

Thus,  $(\mathbf{x}_9, \mathbf{y}_9)$  is not an ESS.

$$(\mathbf{x}_{10}, \mathbf{y}_{10}) = (\delta_2 \mathbf{e}_2 + (1 - \delta_2) \mathbf{e}_3, \mathbf{e}_2)$$

$$\text{where } \delta_2 = \frac{(1-r)(C-S) - qr(B-C+S)}{(1-q)r(B-C+S)}$$

now

(B.10)

$$(\mathbf{x}_{10}, \mathbf{y}_{10}) \neq (\mathbf{x}_{10}, \mathbf{e}_3)$$

but

$$\alpha_{ij}((\mathbf{x}_{10}, \mathbf{y}_{10}), (\mathbf{x}_{10}, \mathbf{e}_3)) = 0 \text{ for } i, j = 0, 1$$

and

$$\beta_{00}((\mathbf{x}_{10}, \mathbf{y}_{10}), (\mathbf{x}_{10}, \mathbf{e}_3)) = -(1-r) \frac{B(D-C)}{B-C+S}$$

Thus,  $(\mathbf{x}_{10}, \mathbf{y}_{10})$  is not an ESS.

$$(\mathbf{x}_{11}, \mathbf{y}_{11}) = (\pi \mathbf{e}_2 + (1-\pi) \mathbf{e}_3, \mathbf{e}_3) \quad : \pi = \frac{(1-r)(C-S)}{(1-q)r(B-C+S)}$$

$$\alpha_{00}((\mathbf{x}_{11}, \mathbf{y}_{11}), (\mathbf{x}, \mathbf{y})) = r(C-S)[1 - (1-q)\pi]x_1 = gx_1$$

i.e.,

$$\alpha_{00}((\mathbf{x}_{11}, \mathbf{y}_{11}), (\mathbf{x}, \mathbf{y}))_1 = 0 \Leftrightarrow \mathbf{x} = \mathbf{x}_\lambda \equiv \lambda \mathbf{e}_2 + (1-\lambda) \mathbf{e}_3 \text{ for } 0 \leq \lambda \leq 1$$

(B.11a)

and

$$\beta_{00}((\mathbf{x}_{11}, \mathbf{y}_{11}), (\mathbf{x}, \mathbf{y})) = (D-C+g)y_1 + (1-r) \frac{B(D-C)}{B-C+S} y_2$$

thus

$$\beta_{00}((\mathbf{x}_{11}, \mathbf{y}_{11}), (\mathbf{x}, \mathbf{y})) = 0 \Leftrightarrow \mathbf{y} = \mathbf{e}_3$$

but

$$\alpha_{10}((\mathbf{x}_{11}, \mathbf{y}_{11}), (\mathbf{x}_\lambda, \mathbf{e}_3)) = r(1-q)(S-B+C)(\lambda-\pi)^2$$

Hence  $(\mathbf{x}_{11}, \mathbf{y}_{11}) \leftrightarrow (\mathbf{TfT}_H \oplus \mathbf{DE}_H, \mathbf{DE}_L)$  is an ESS whenever

(B.11b)

$$B/2 < C, B-C < S < C, \text{ and } q < \theta_2.$$

$$(\mathbf{x}_{12}, \mathbf{y}_{12}) = (\eta_1 \mathbf{e}_1 + (1-\eta_1) \mathbf{e}_3, \kappa_1 \mathbf{e}_2 + (1-\kappa_1) \mathbf{e}_3)$$

$$\eta_1 = \frac{(C-S)(S+B-D) - (1-r)B(D-S)}{(1-q)rB(D-S)}; \kappa_1 = \frac{C-S}{qrB}$$

here

$$\kappa_1 > 0 \Leftrightarrow S < C < D$$

(B.12)

now

$$(\mathbf{x}_{12}, \mathbf{y}_{12}) \neq (\mathbf{e}_2, \mathbf{y}_{12})$$

but

$$\alpha_{00}((\mathbf{x}_{12}, \mathbf{y}_{12}), (\mathbf{e}_2, \mathbf{y}_{12})) = -\frac{(C-S)(D-C)}{D-S} < 0$$

and

$$\beta_{ij}((\mathbf{x}_{12}, \mathbf{y}_{12}), (\mathbf{e}_2, \mathbf{y}_{12})) = 0 \text{ for } i, j = 0, 1$$

Thus,  $(\mathbf{x}_{12}, \mathbf{y}_{12})$  is not an ESS.

$$\begin{aligned}
 (\mathbf{x}_{13}, \mathbf{y}_{13}) &= (\gamma_2 \mathbf{e}_2 + (1 - \gamma_2) \mathbf{e}_3, \kappa_2 \mathbf{e}_1 + (1 - \kappa_2) \mathbf{e}_3) \\
 \gamma_2 &= \frac{D - S}{(1 - q)rB}; \quad \kappa_2 = \frac{(D - S)(B - C + S) + (1 - r)B(C - S)}{qrB(C - S)} \\
 \text{now} \\
 (\mathbf{x}_{13}, \mathbf{y}_{13}) &\neq (\mathbf{e}_1, \mathbf{y}_{13}) \\
 \text{but} \\
 \alpha_{00}((\mathbf{x}_{13}, \mathbf{y}_{13}), (\mathbf{e}_1, \mathbf{y}_{13})) &= -(D - C) \\
 \text{and} \\
 \beta_{ij}((\mathbf{x}_{13}, \mathbf{y}_{13}), (\mathbf{e}_1, \mathbf{y}_{13})) &= 0 \text{ for } i, j = 0, 1
 \end{aligned}
 \tag{B.13}$$

Thus,  $(\mathbf{x}_{13}, \mathbf{y}_{13})$  is not an ESS.

$$\begin{aligned}
 (\mathbf{x}_\lambda, \mathbf{y}_\mu) \in \Lambda &= \{(\lambda \mathbf{e}_1 + (1 - \lambda) \mathbf{e}_2, \mu \mathbf{e}_1 + (1 - \mu) \mathbf{e}_2) \mid \lambda, \mu \in [0, 1]\} \\
 \text{now} \\
 \alpha_{00}((\mathbf{x}_\lambda, \mathbf{y}_\mu), (\mathbf{x}, \mathbf{y})) &= \{S - C + rB[1 - (1 - q)\lambda - q\mu]\}x_3 \\
 \text{and} \\
 \beta_{00}((\mathbf{x}_\lambda, \mathbf{y}_\mu), (\mathbf{x}, \mathbf{y})) &= \{S - D + rB[1 - (1 - q)\lambda - q\mu]\}y_3
 \end{aligned}
 \tag{B.14a}$$

Hence  $\Lambda$  is an ES set whenever

$$S > D.
 \tag{B.14b}$$

### References for Appendices A and B.

Cressman, R. (1992). *The Stability Concept of Evolutionary Game Theory*. Berlin: Springer-Verlag.

Fishman, M. A., Lotem, A. & Stone, L. (2001). Heterogeneity stabilizes reciprocal altruism interactions. *J. Theor. Biol.*, **209**, 87 - 95.

Weibull, J. W. (1996). *Evolutionary Game Theory*. Cambridge, Mass., MIT Press. Second edition, pp 167.
